# Supplementary material for: Metal–phenanthroline fused Ti17 clusters, a single molecular source for sensitized photoconductive films
Source: Royal Society of Chemistry journal article supplement (doi:10.1039/c3ta11571b), 2013-01-01
Supplement: c3ta11571b.pdf [file c3ta11571b.pdf]

## Supporting Information for

# Metal-Phenanthroline Fused $Ti_{17}$ Clusters, a Single Molecular Source for Sensitized Photoconductive Film

Yin-Yin Wu,<sup>a</sup> Peng Wang,<sup>a</sup> Yu-Hong Wang,<sup>a</sup> Jian-Bing Jiang,<sup>a</sup> Guo-Qing Bian,<sup>a</sup>

Qin-Yu Zhu,<sup>\*ab</sup> and Jie Dai<sup>\*ab</sup>

## 1. Figures

**Figure S1.** The experimental XRD patterns and the crystal data simulated patterns of compounds **1** (a) and **2** (b).

**Figure S2.** Solution of compound **1** in a mixture of toluene and methanol.

**Figure S3.** SEM images of the micro structures of the film of **F1** (prepared at room temperature, except the indicated), showing the hollows (a), bowls (b), surface roughed hollows (c), connected hollows (d), and particle morphologies prepared at higher evaporation rates at temperature 40 °C (e) and 80 °C (f).

**Figure S4** The experimental XRD pattern of the film **F1**.

**Figure S5.** The Raman spectrum of the  $TiO_2$  (AIST data).

**Figure S6.** The IR spectra of the crystal **1** and the film **F1**.

**Figure S7.** The EDX spectra of the **F1** (a) and **F2** (b).

**Figure S8.** The SEM images showing the thickness of the films, (a) **F1**, (b) **F2**, and (c)  $FTi_{17}$ .

## 2. Table

**Table S1.** Crystal Data and Structural Refinement Parameters for **1** and **2**.

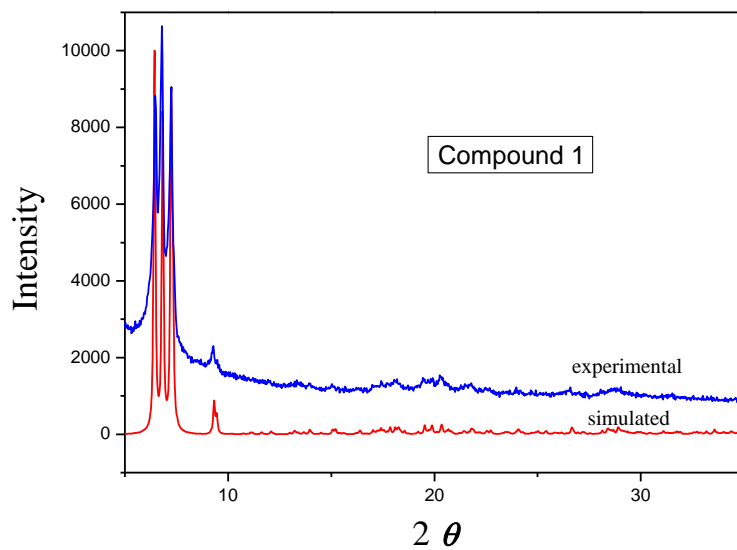

(a)

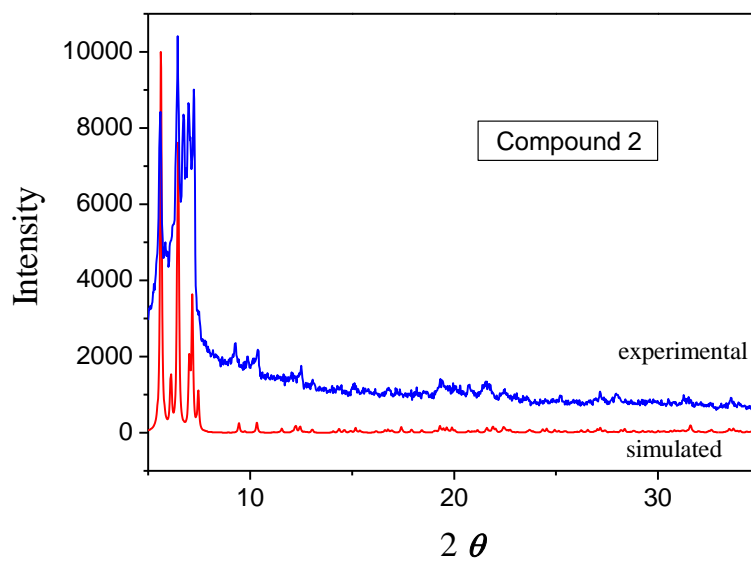

(b)

**Figure S1.** The experimental XRD patterns and the crystal data simulated patterns of compounds **1** (a) and **2** (b).

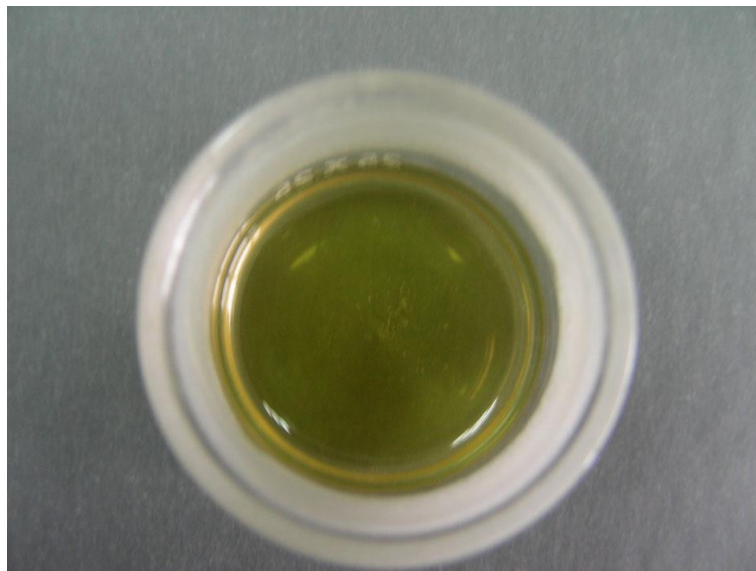

**Figure S2.** Solution of compound **1** in a mixture of toluene and methanol.

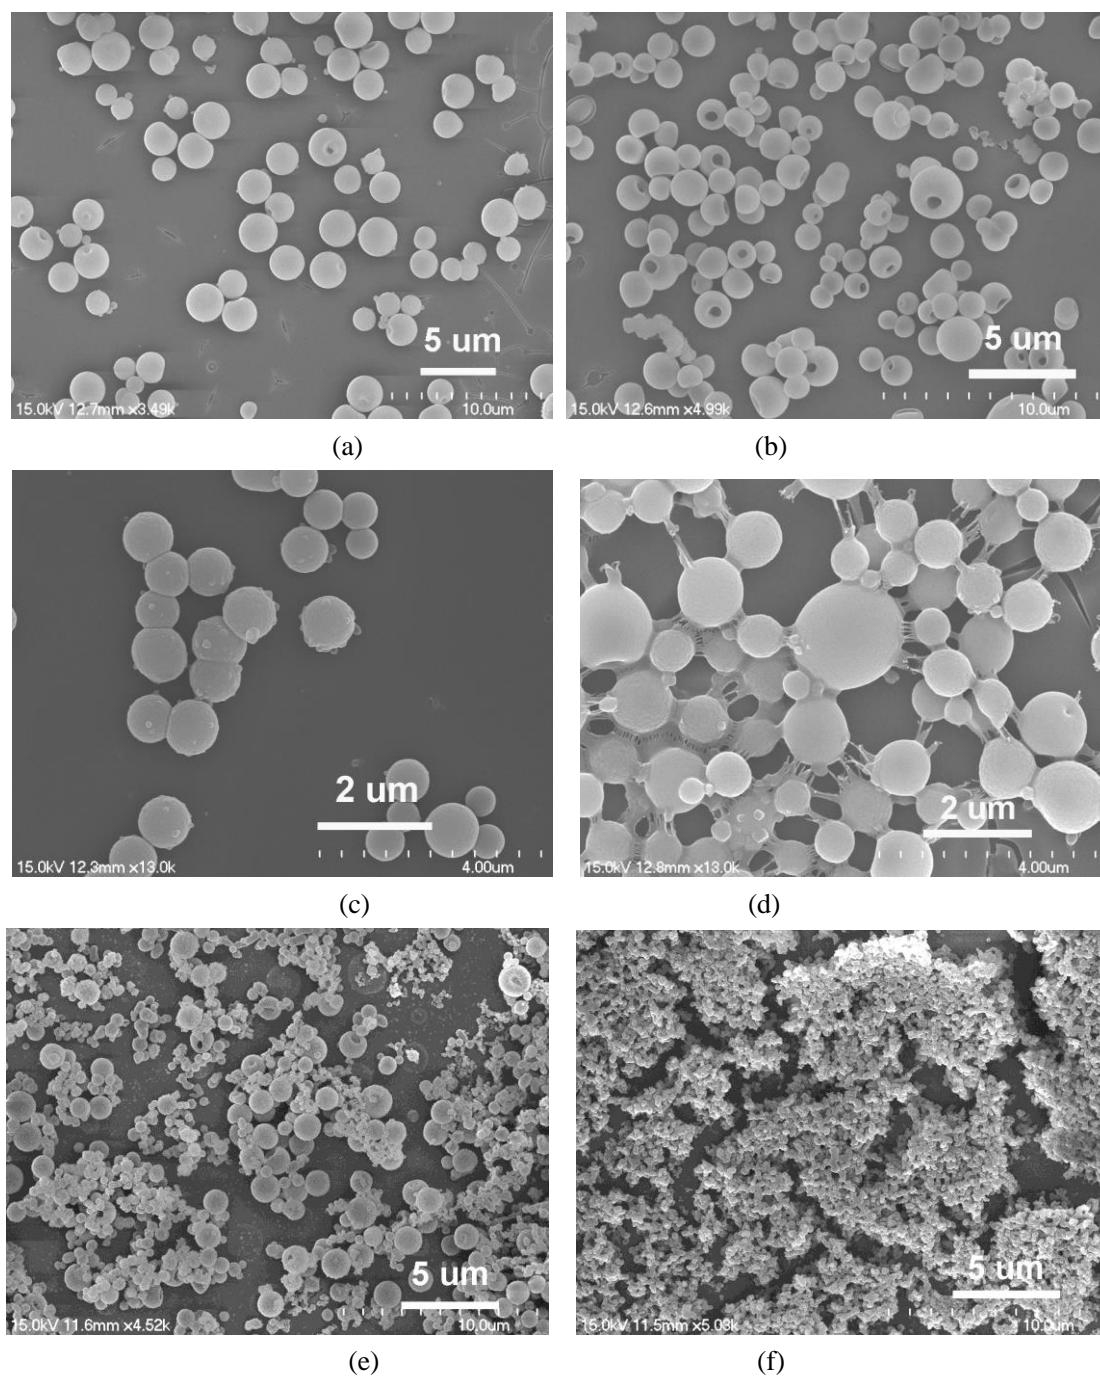

**Figure S3.** SEM images of the micro structures of the film of F1 (prepared at room temperature, except the indicated), showing the hollows (a), bowls (b), surface roughed hollows (c), connected hollows (d), and particle morphologies prepared at higher evaporation rates at temperature 40 °C (e) and 80 °C (f).

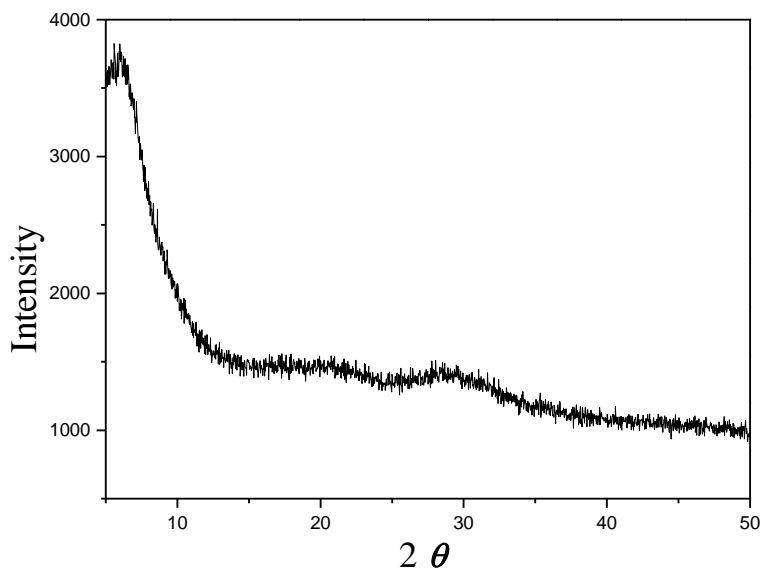

**Figure S4.** The experimental XRD pattern of the film **F1**.

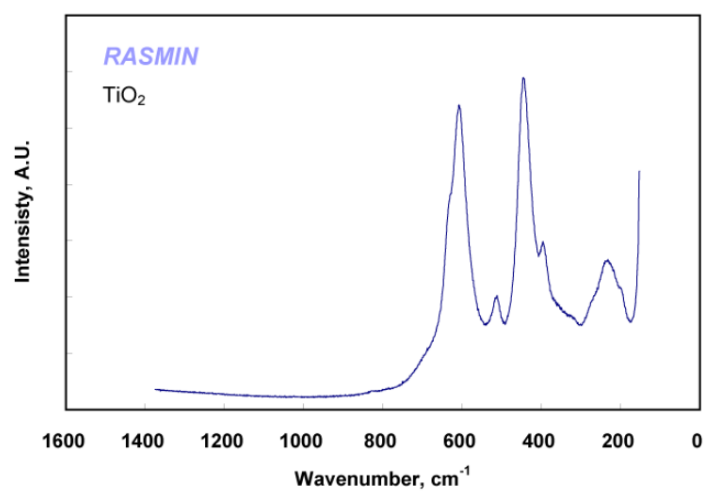

**Figure S5.** The Raman spectrum of the TiO<sub>2</sub> (AIST data).

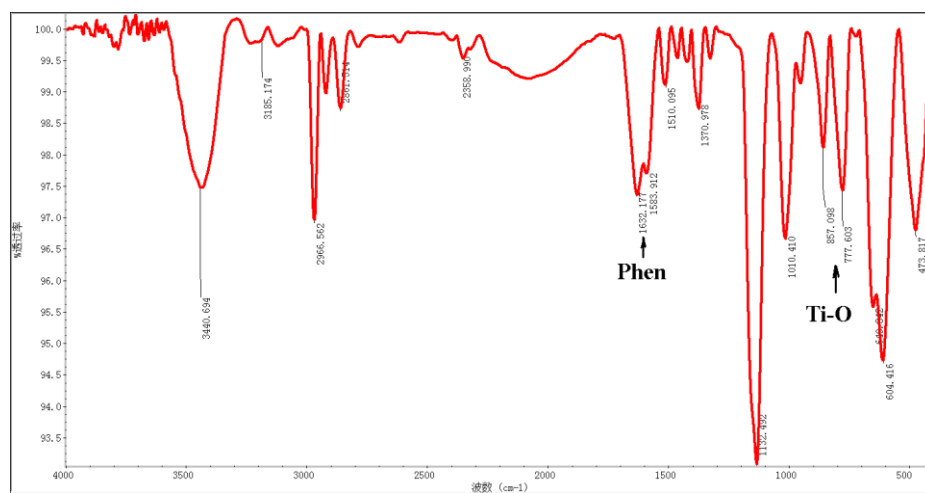

(a)

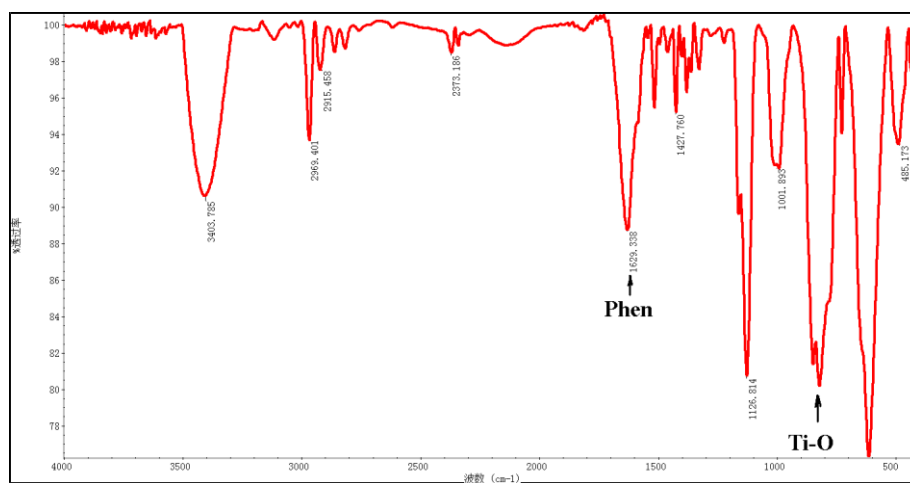

(b)

Figure S6. The IR spectra of the crystal **1** (a) and the film F1 (b).

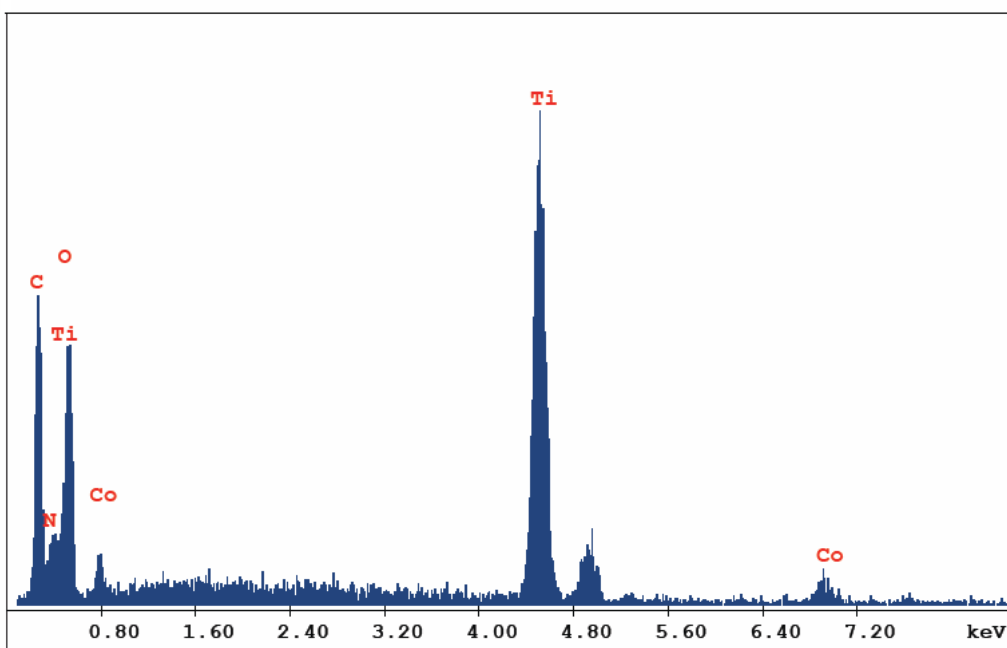

(a)

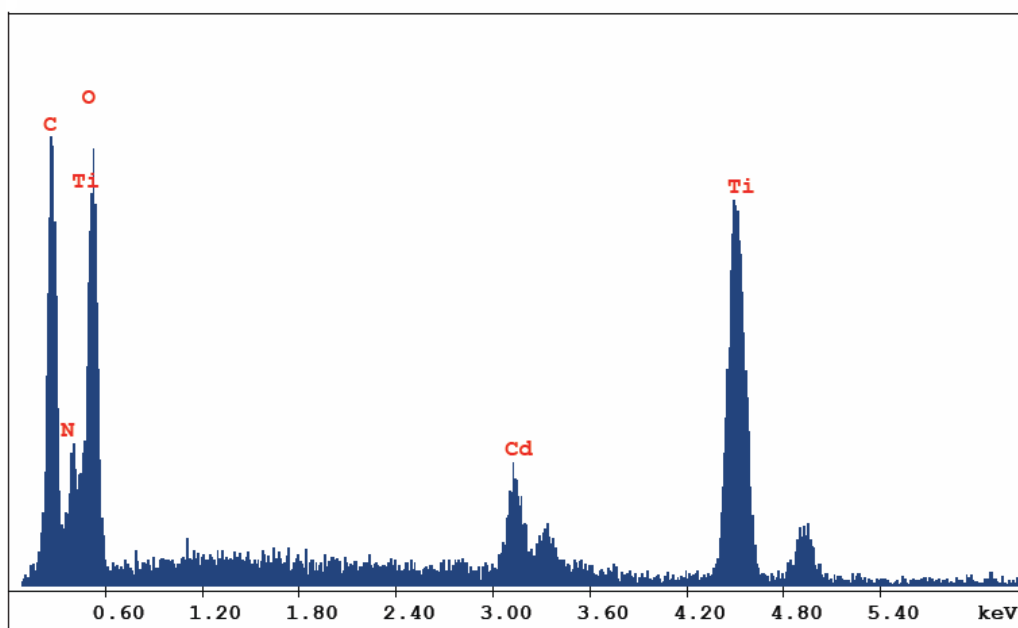

(b)

**Figure S7.** The EDX spectra of the F1 (a) and F2 (b).

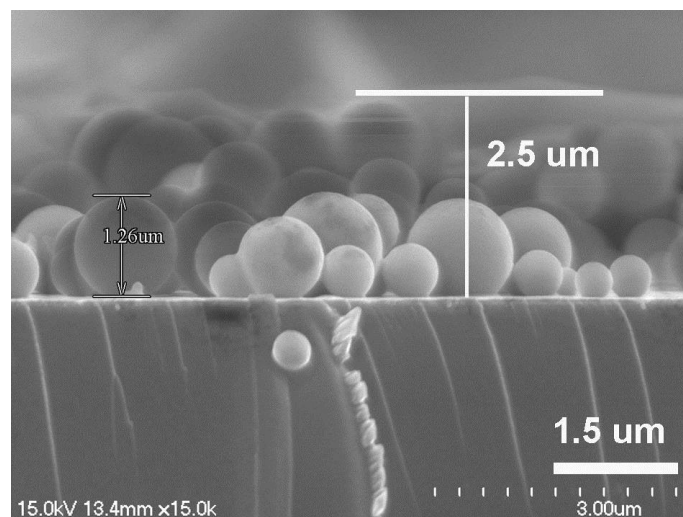

(a)

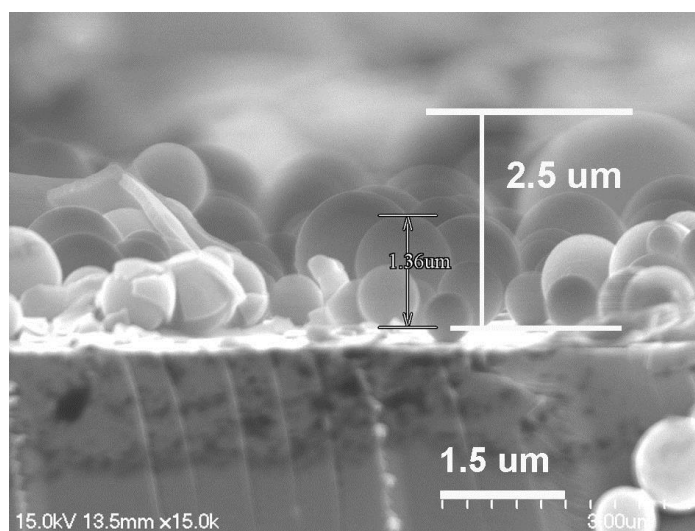

(b)

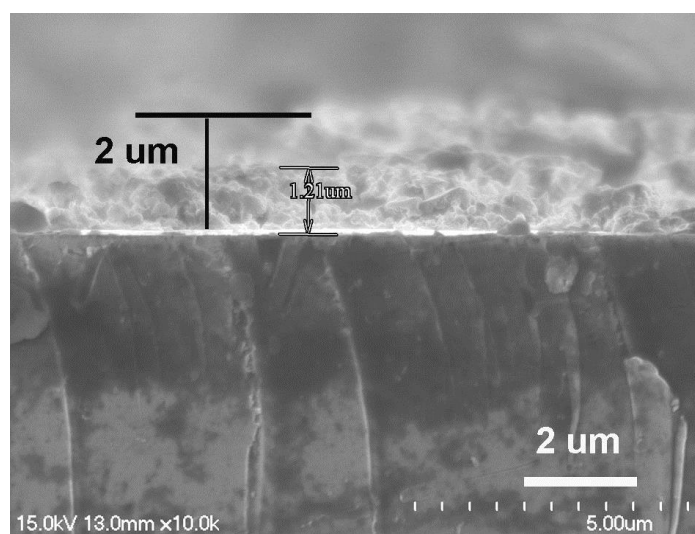

(c)

**Figure S8.** The SEM images showing the thickness of the films, (a) F1, (b) F2, and (c) FTi<sub>17</sub>.



**Table S1.** Crystal Data and Structural Refinement Parameters for **1** and **2**.

|                                                                                                 | <b>1</b>                                                                                         | <b>2</b>                                                                                         |
|-------------------------------------------------------------------------------------------------|--------------------------------------------------------------------------------------------------|--------------------------------------------------------------------------------------------------|
| formula                                                                                         | C <sub>72</sub> H <sub>128</sub> Co <sub>2</sub> N <sub>4</sub> O <sub>44</sub> Ti <sub>17</sub> | C <sub>78</sub> H <sub>142</sub> Cd <sub>2</sub> N <sub>4</sub> O <sub>46</sub> Ti <sub>17</sub> |
| Fw                                                                                              | 2685.64                                                                                          | 2910.76                                                                                          |
| cryst size (mm <sup>3</sup> )                                                                   | 0.60 × 0.20 × 0.15                                                                               | 0.20 × 0.20 × 0.20                                                                               |
| cryst syst                                                                                      | monoclinic                                                                                       | monoclinic                                                                                       |
| space group                                                                                     | <i>P2<sub>1</sub>/n</i>                                                                          | <i>C2/c</i>                                                                                      |
| <i>a</i> (Å)                                                                                    | 15.800(3)                                                                                        | 18.802(5)                                                                                        |
| <i>b</i> (Å)                                                                                    | 27.683(6)                                                                                        | 28.875(6)                                                                                        |
| <i>c</i> (Å)                                                                                    | 25.877(5)                                                                                        | 23.835(6)                                                                                        |
| <i>α</i> (deg)                                                                                  | 90.0                                                                                             | 90.00                                                                                            |
| <i>β</i> (deg)                                                                                  | 90.90(3)                                                                                         | 96.129(5)                                                                                        |
| <i>γ</i> (deg)                                                                                  | 90.0                                                                                             | 90.00                                                                                            |
| <i>V</i> (Å <sup>3</sup> )                                                                      | 11317(4)                                                                                         | 12866(5)                                                                                         |
| <i>Z</i>                                                                                        | 4                                                                                                | 4                                                                                                |
| $\rho_{\text{calcd}}$ (g cm <sup>-3</sup> )                                                     | 1.576                                                                                            | 1.575                                                                                            |
| <i>F</i> (000)                                                                                  | 5472                                                                                             | 6232                                                                                             |
| $\mu$ (mm <sup>-1</sup> )                                                                       | 1.486                                                                                            | 1.390                                                                                            |
| <i>T</i> (K)                                                                                    | 293.2(2)                                                                                         | 223(2)                                                                                           |
| <i>R</i> <sub>int</sub>                                                                         | 0.0880                                                                                           | 0.0675                                                                                           |
| reflns collected                                                                                | 54537                                                                                            | 51830                                                                                            |
| unique reflns                                                                                   | 19740                                                                                            | 11255                                                                                            |
| observed reflns                                                                                 | 10392                                                                                            | 8914                                                                                             |
| no. params                                                                                      | 1259                                                                                             | 693                                                                                              |
| GOF on <i>F</i> <sup>2</sup>                                                                    | 1.014                                                                                            | 1.022                                                                                            |
| <i>R</i> <sub>1</sub> [ <i>I</i> >2σ( <i>I</i> )] / <i>R</i> <sub>1</sub> <sup><i>a</i></sup>   | 0.1099/0.1899                                                                                    | 0.0818/0.1051                                                                                    |
| <i>wR</i> <sub>2</sub> [ <i>I</i> >2σ( <i>I</i> )] / <i>wR</i> <sub>2</sub> <sup><i>b</i></sup> | 0.2165/0.2549                                                                                    | 0.1749/0.1853                                                                                    |
